# Supplementary material
Source: HighWire-hosted journal article supplement (https://informatics.bmj.com/content/27/1/e100109)
Supplement: inline-supplementary-material-1 [file inline-supplementary-material-1.pdf]

## SUPPLEMENTAL MATERIALS

**Supplementary Table 1:** SIRS Criteria and organ dysfunction criteria used to identify positive cases of severe sepsis.

| SIRS Criteria                                                                                                                                                                                                                                                                                        | Organ Dysfunction Criteria                                                                                                                                                                                                                                                                                                                                                                                                                                                                                                                                                                                              |
|------------------------------------------------------------------------------------------------------------------------------------------------------------------------------------------------------------------------------------------------------------------------------------------------------|-------------------------------------------------------------------------------------------------------------------------------------------------------------------------------------------------------------------------------------------------------------------------------------------------------------------------------------------------------------------------------------------------------------------------------------------------------------------------------------------------------------------------------------------------------------------------------------------------------------------------|
| <ul style="list-style-type: none"> <li>Heart rate &gt; 90 beats/ min,</li> <li>Body temperature &gt; 38 °C or &lt; 36 °C,</li> <li>Respiratory rate &gt;20 breaths/min or PaCO<sub>2</sub> &lt; 32 mmHg, and</li> <li>White blood cell count &gt; 12,000 cells/μL or &lt; 4,000 cells/μL.</li> </ul> | <ul style="list-style-type: none"> <li>Lactate &gt; 2 mmol/L</li> <li>Systolic blood pressure &lt; 90 mmHg</li> <li>Urine output &lt; 0.5 mL/kg, over two hours, prior to organ dysfunction after fluid resuscitation</li> <li>Creatinine &gt; 2 mg/dL without renal insufficiency or chronic dialysis</li> <li>Bilirubin &gt; 2 mg/dL without having liver disease or cirrhosis</li> <li>Platelet count &lt; 100,000 μL</li> <li>International normalized ratio &gt; 1.5</li> <li>PaO<sub>2</sub>/FiO<sub>2</sub> &lt; 200 in addition to pneumonia &lt; 250 with acute kidney injury but without pneumonia</li> </ul> |

**Supplementary Table 2:** Patient data abstraction for clinical outcomes analyses.

| Vital Signs                                                                                                                                                                                                             | Laboratory Measurements                                                                                                                                                                                                                                     | Medication                                                                                             |
|-------------------------------------------------------------------------------------------------------------------------------------------------------------------------------------------------------------------------|-------------------------------------------------------------------------------------------------------------------------------------------------------------------------------------------------------------------------------------------------------------|--------------------------------------------------------------------------------------------------------|
| Diastolic blood pressure<br>Systolic blood pressure<br>Heart rate<br>Temperature<br>Respiratory rate<br>Oxygen saturation<br>Fractional inspiration of oxygen<br>Arterial oxygen saturation<br>Glasgow Coma Scale (GCS) | Total bilirubin levels<br>Conjugated bilirubin levels<br>White Blood Cell count<br>Platelet count<br>Creatinine levels<br>Urine output<br>Blood urea nitrogen (BUN)<br>International normalized ratio (INR)<br>Lactate<br>FiO <sub>2</sub><br>pH<br>Glucose | Antibiotics<br>Dobutamine<br>Dopamine<br>Epinephrine<br>Norepinephrine<br>Phenylephrine<br>Vasopressin |
